# Supplementary material for: Understanding zinc-doped hydroxyapatite structures using first-principles calculations and convolutional neural network algorithm
Source: Royal Society of Chemistry journal article supplement (doi:10.1039/d1tb02687a), 2022-01-01
Supplement: d1tb02687a1.pdf [file d1tb02687a1.pdf]

*Supporting Information for*

**Understanding the Zinc-Doped Hydroxyapatite Structures Using the First-Principles Calculations and Convolutional Neural Network Algorithm**

Jing Wang<sup>1</sup>, Ruihan Wang<sup>1</sup>, Mingli Yang<sup>2</sup> and Dingguo Xu<sup>1,2\*</sup>

<sup>1</sup>MOE Key Laboratory of Green Chemistry and Technology, College of Chemistry,

Sichuan University, Chengdu, Sichuan, 610064, PR China

<sup>2</sup>Research Center for Material Genome Engineering, Sichuan University, Chengdu,

Sichuan, 610065, PR China

\* To whom correspondence should be addressed: dgxu@scu.edu.cn (D.X), Tel: 86-28-85406156.

1. The number of structures for each doping concentration in the initial dataset
2. The number of the structures by the three substitution mechanisms in the lowest energy range.
3. The two leading principal components of the feature extraction vector learned by 5 Zn atoms doped HAP.
4. Detailed display of three Zn<sup>2+</sup> doped structures.
5. Substitution mechanisms when two Zn are doped in the same Ca2-V channel.
6. The volumes between the most stable and the most unstable structures.

Table S1. The number of structures for 5 doping concentrations in the initial dataset.

| Concentration (mol%)              | 1.25 | 2.5  | 3.75  | 5      | 6.25    |
|-----------------------------------|------|------|-------|--------|---------|
| all the structures                | 80   | 2800 | 56000 | 700000 | 5600000 |
| Structures in the initial dataset | 56   | 130  | 300   | 604    | 1370    |

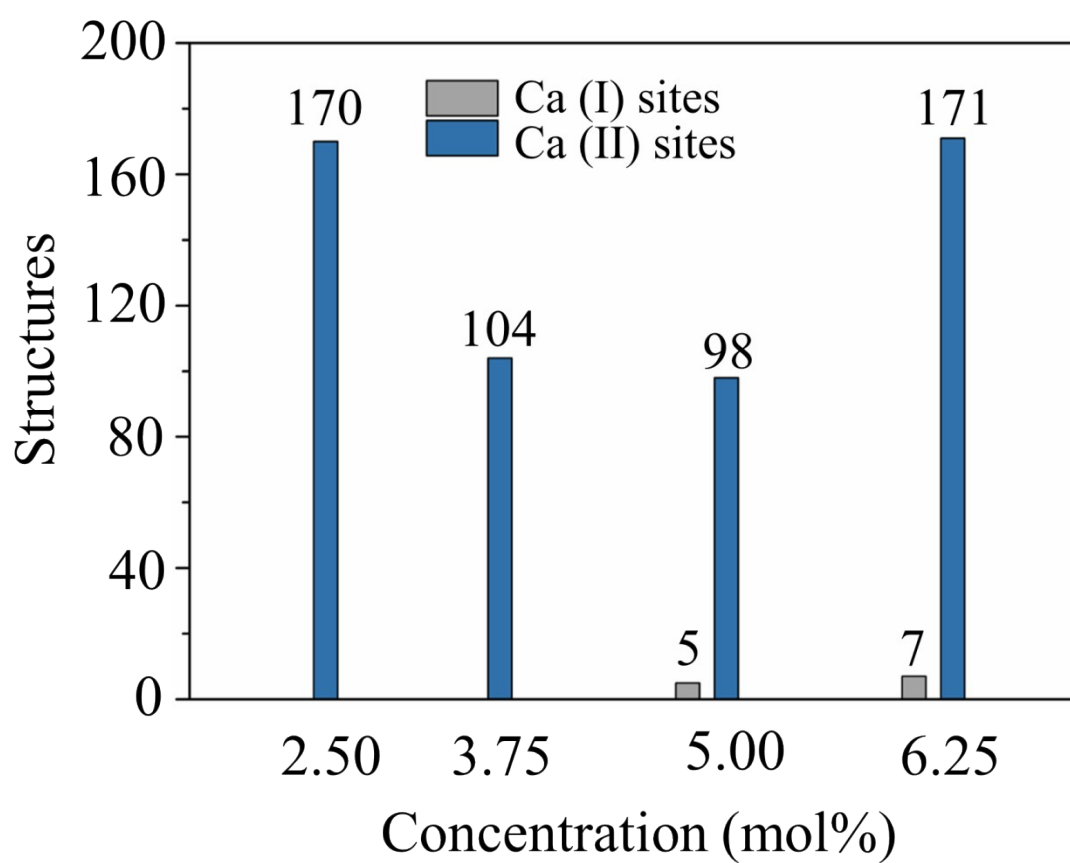

**Figure S1.** For the doping concentration of 2.5-6.25mol%, the number of the structures by the three substitution mechanisms in the lowest 5kcal/mol energy range.

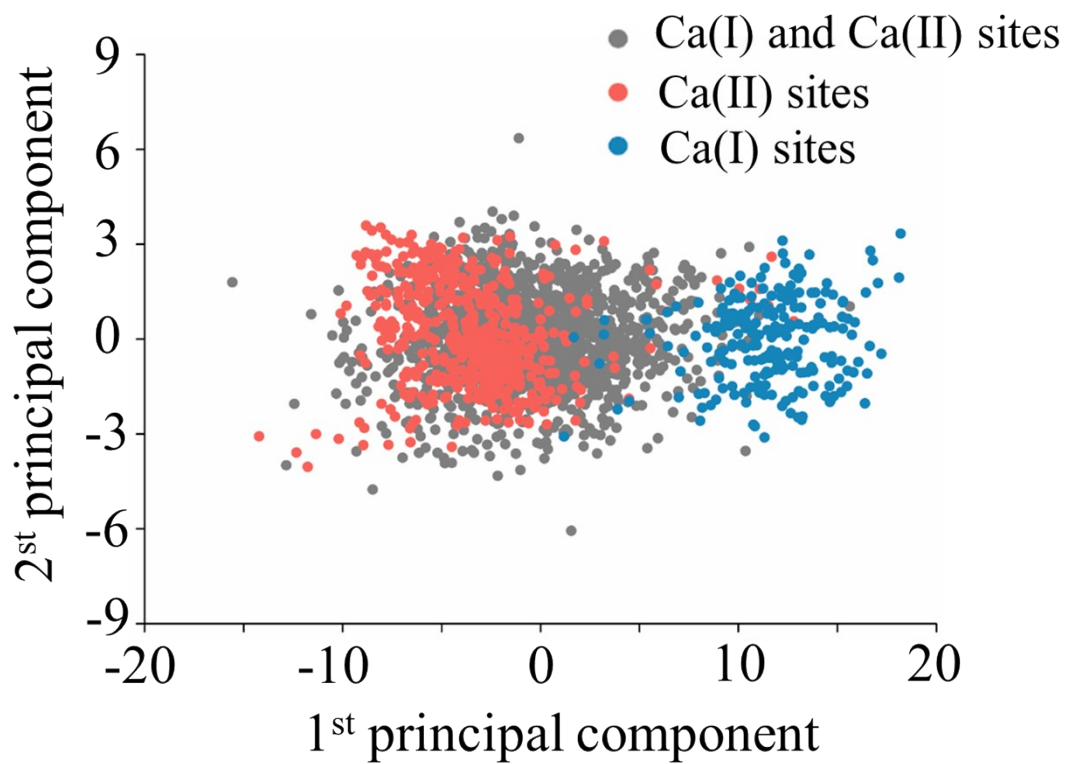

**Figure S2.** The two leading principal components of the feature extraction vector learned by Zn doped HAP with the concentration of 6.25 at.%.

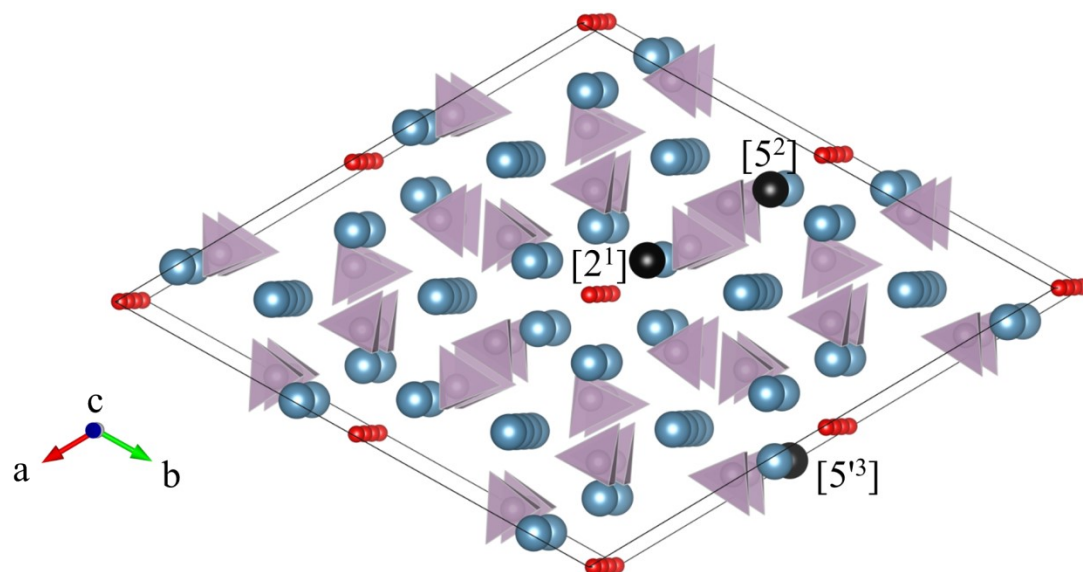

**Figure S3.** Detailed display of three  $\text{Zn}^{3+}$  doped structures.

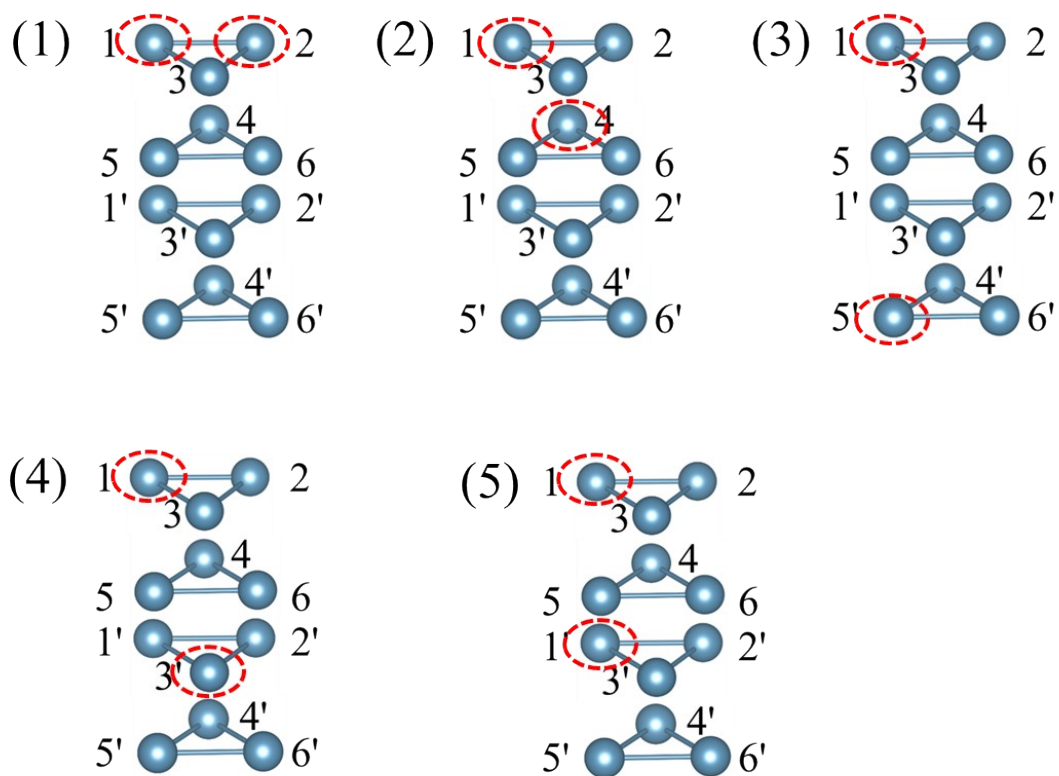

**Figure S4.** There are five different representative substitution mechanisms when two zinc atoms are doped in the same Ca<sub>2</sub>-V channel.

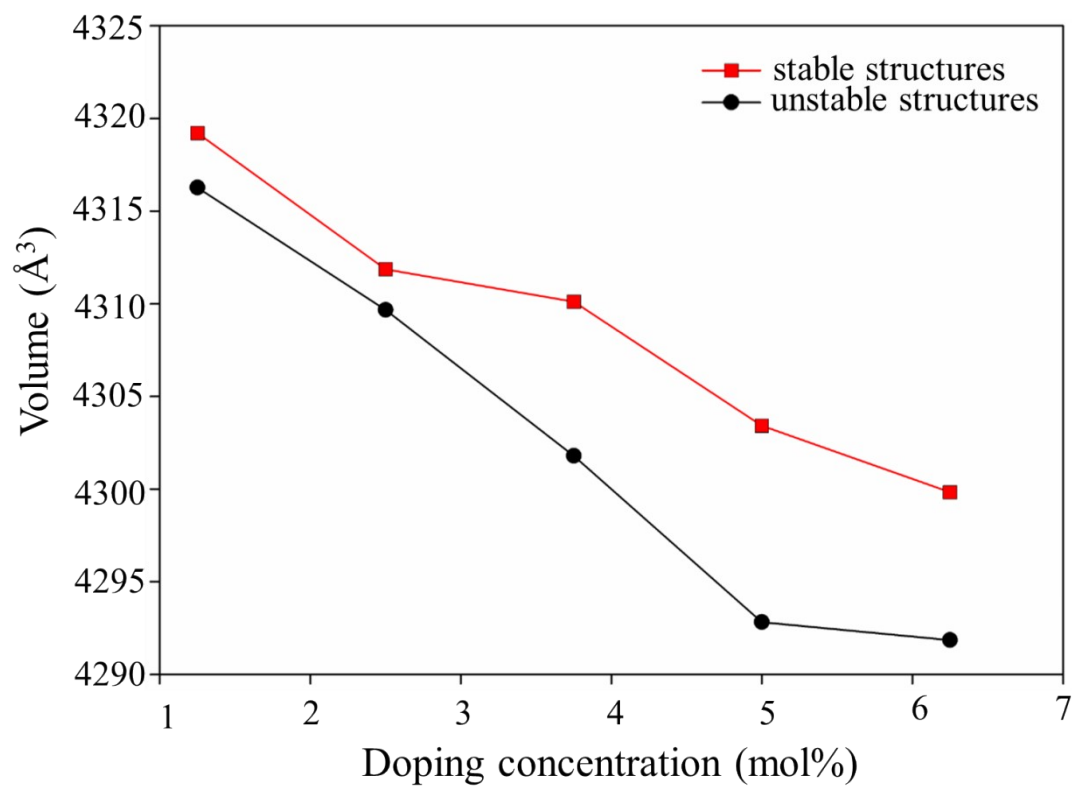

**Figure S5.** The comparison results of the volumes between the most stable and the most unstable structures.
